# Supplementary material for: One-Year Outcomes of Ear Molding for Infants with Constricted Ear
Source: PubMed Central journal article supplement — Plast Reconstr Surg. 2022 Oct 18;151(1):159–66. doi: 10.1097/PRS.0000000000009781 (PMC9788922; doi:10.1097/prs.0000000000009781), 2022-10-18
Supplement: prs-151-0159-s001.pdf [file prs-151-0159-s001.pdf]

### Supplemental Digital Content 1. Classification of constricted ears\*

| Anatomical feature         | Class 1   | Class 2                 | Class 3               |
|----------------------------|-----------|-------------------------|-----------------------|
| Longitudinal axis          | Shortened | Mild Shortened          | Severe shortened      |
| Superior crus              | Flattened | Absent                  | Absent                |
| Scapha                     | Present   | Shortened and decreased | Complete obliteration |
| Skin and cartilage deficit | Mild      | Moderate                | Severe                |
| Resistance force           | Mild      | Moderate                | Severe                |
| Prominence                 | Mild      | Moderate                | Severe                |

\*From Daniali LN, Rezzadeh K, Shell C, Trovato M, Ha R, Byrd HS. Classification of newborn ear malformations and their treatment with the EarWell Infant Ear Correction System. *Plast Reconstr Surg.* 2017;139:681–691.
