# Supplementary material for: One-Year Outcomes of Ear Molding for Infants with Constricted Ear
Source: PubMed Central journal article supplement — Plast Reconstr Surg. 2022 Oct 18;151(1):159–66. doi: 10.1097/PRS.0000000000009781 (PMC9788922; doi:10.1097/prs.0000000000009781), 2022-10-18
Supplement: prs-151-0159-s002.pdf [file prs-151-0159-s002.pdf]

## Supplemental Digital Content 2. The definition of different grades of relapse

---

| <b>Grade of relapse</b> | <b>Definition</b>                                                                                                                                                                                                   |
|-------------------------|---------------------------------------------------------------------------------------------------------------------------------------------------------------------------------------------------------------------|
| No relapse              | The ear is basically as same as that at the end of the treatment.                                                                                                                                                   |
| Mild relapse            | The ear, especially the upper part, is mildly constricted with shortened longitudinal axis and mild prominence compared to the appearance at the end of the treatment, which is a mild yet non-distracting relapse. |
| Moderate relapse        | The ear, especially the upper part, is moderately constricted with shortened longitudinal axis and moderate prominence compared to the appearance at the end of the treatment, which is a noticeable relapse.       |
| Severe relapse          | The ear has nearly relapsed to the appearance before treatment.                                                                                                                                                     |

---
