# Supplementary material for: One-Year Outcomes of Ear Molding for Infants with Constricted Ear
Source: PubMed Central journal article supplement — Plast Reconstr Surg. 2022 Oct 18;151(1):159–66. doi: 10.1097/PRS.0000000000009781 (PMC9788922; doi:10.1097/prs.0000000000009781), 2022-10-18
Supplement: prs-151-0159-s008.pdf [file prs-151-0159-s008.pdf]

### Supplemental Digital Content 8. Evaluation of Parents' Satisfaction

| <b>Patients' Satisfaction</b> | <b>Scores</b> | <b>No. of Ears (%)</b> |
|-------------------------------|---------------|------------------------|
| Extremely satisfied           | 5             | 46 (50.5%)             |
| Satisfied                     | 4             | 30 (33.0%)             |
| Neutral                       | 3             | 10 (11.0%)             |
| Dissatisfied                  | 2             | 3 (3.3%)               |
| Extremely dissatisfied        | 1             | 2 (2.2%)               |
