# Supplementary figures and images for: One-Year Outcomes of Ear Molding for Infants with Constricted Ear
Source: PubMed Central journal article supplement — Plast Reconstr Surg. 2022 Oct 18;151(1):159–66. doi: 10.1097/PRS.0000000000009781 (PMC9788922; doi:10.1097/prs.0000000000009781), 2022-10-18

**Before treatment**

**Treatment termination**

**1-year follow-up**

**Class I**

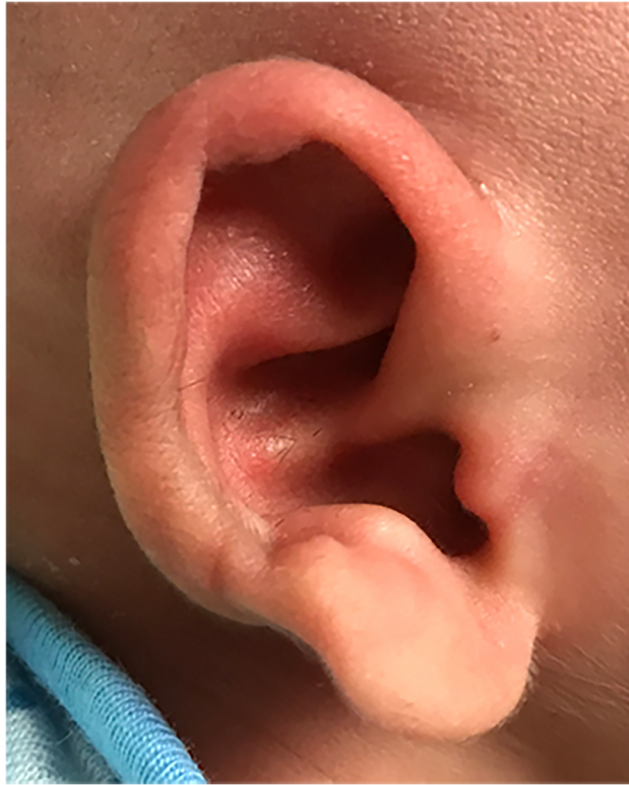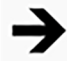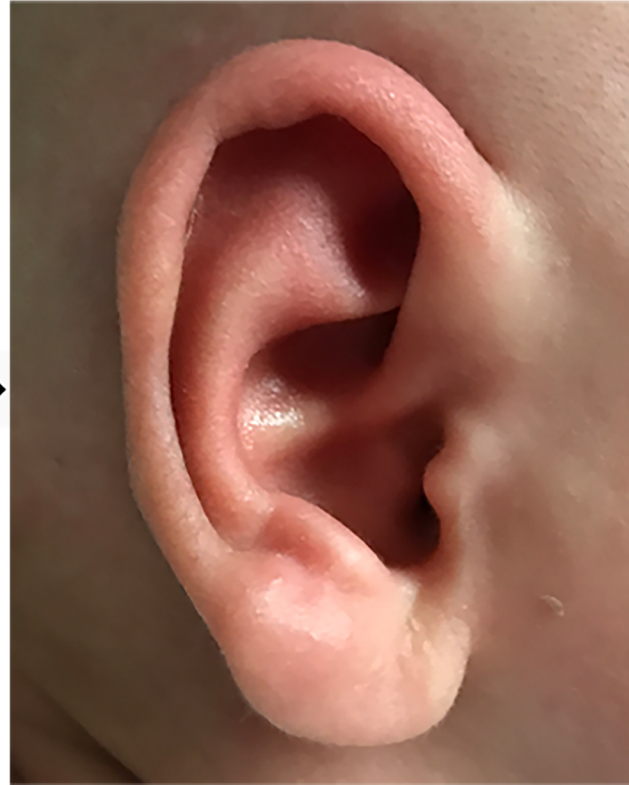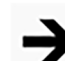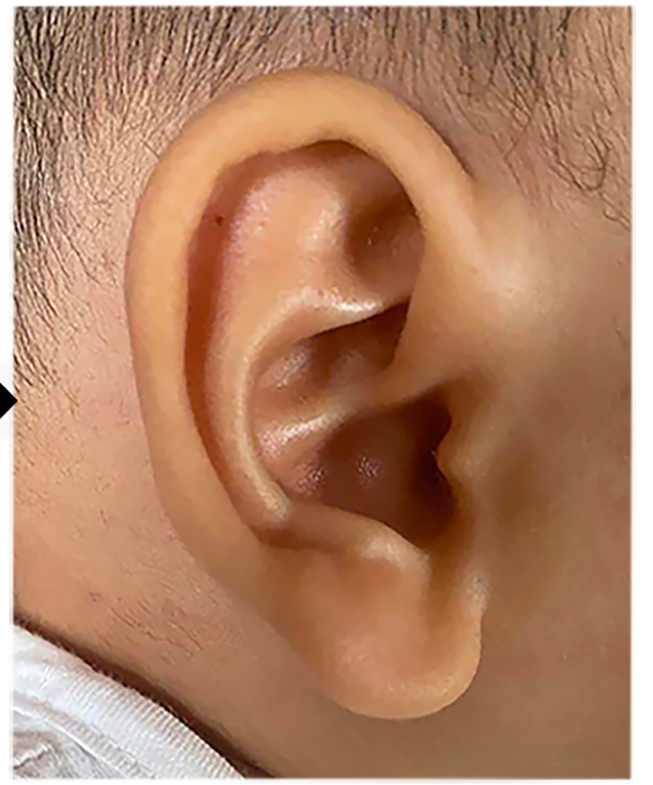

**Class II**

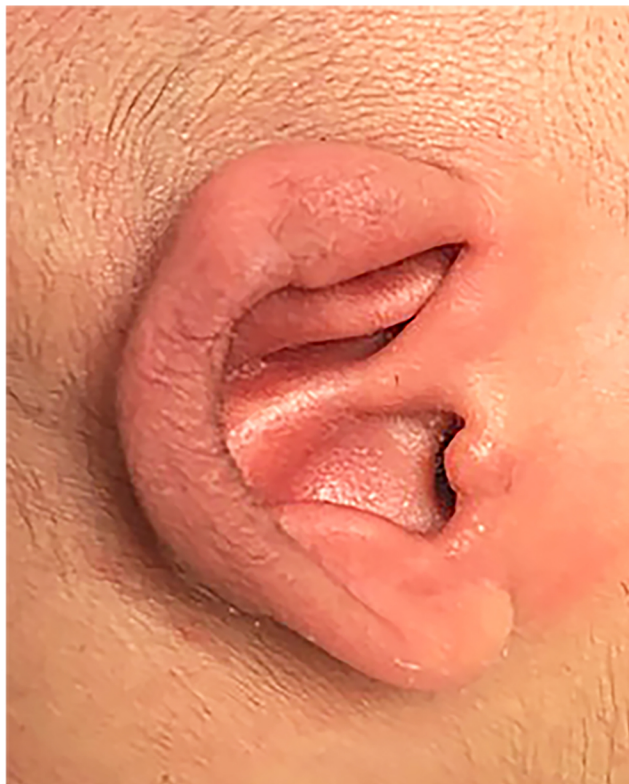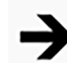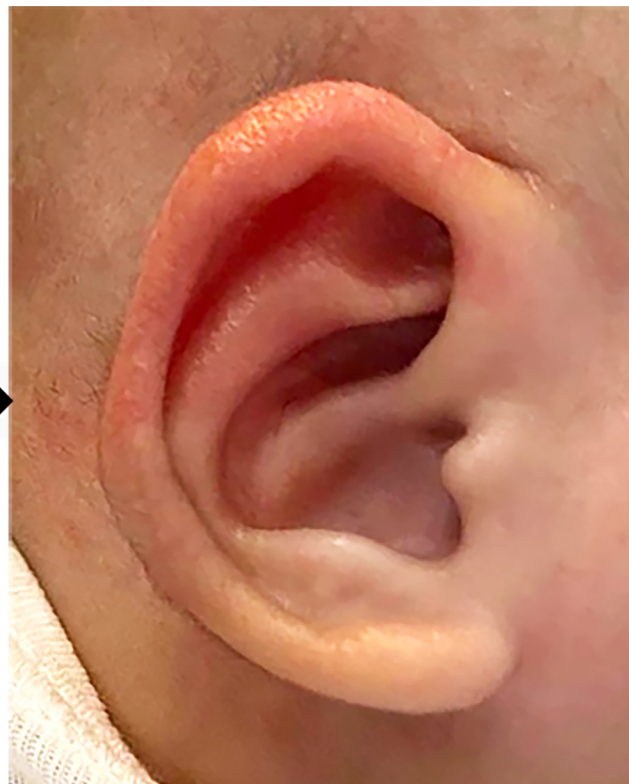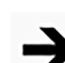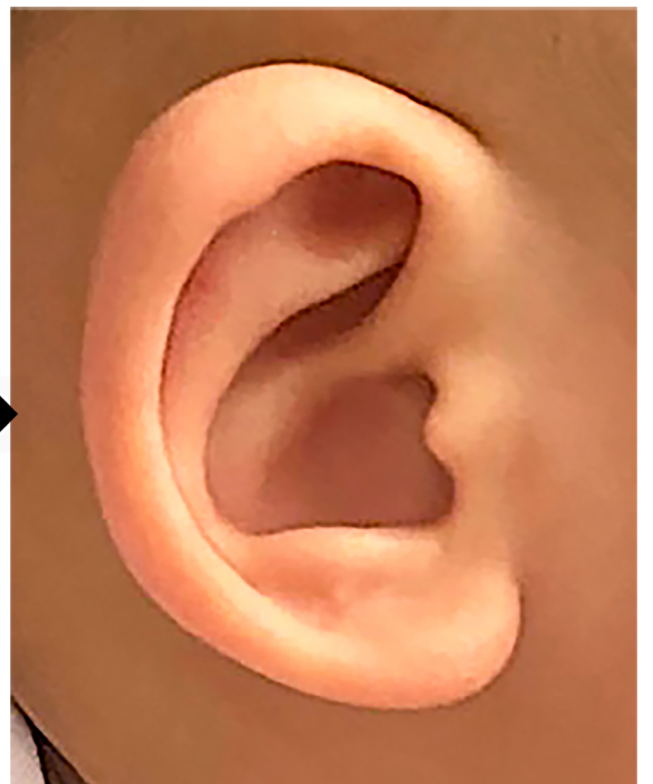

**Class III**

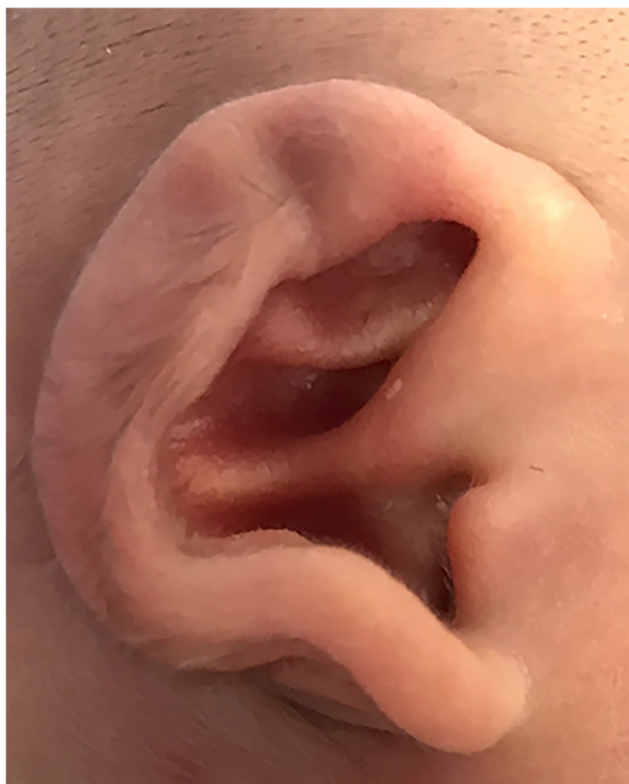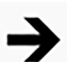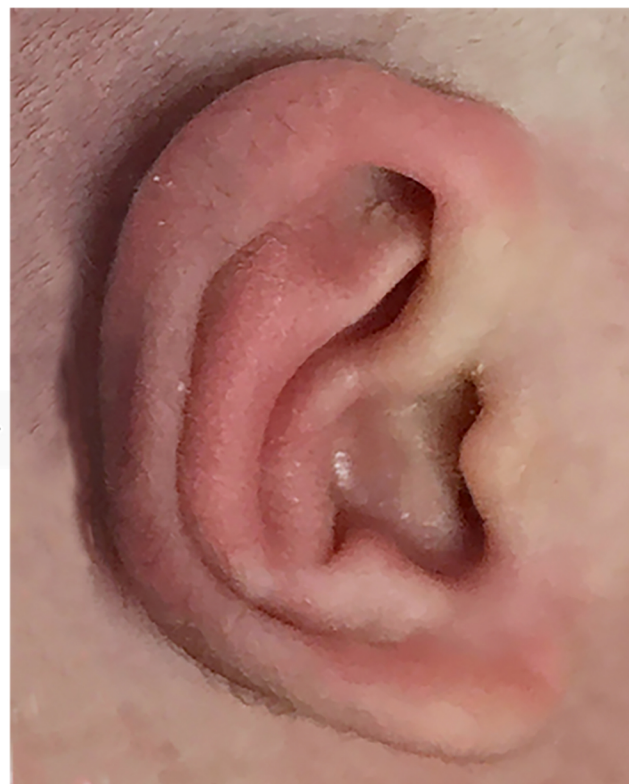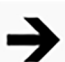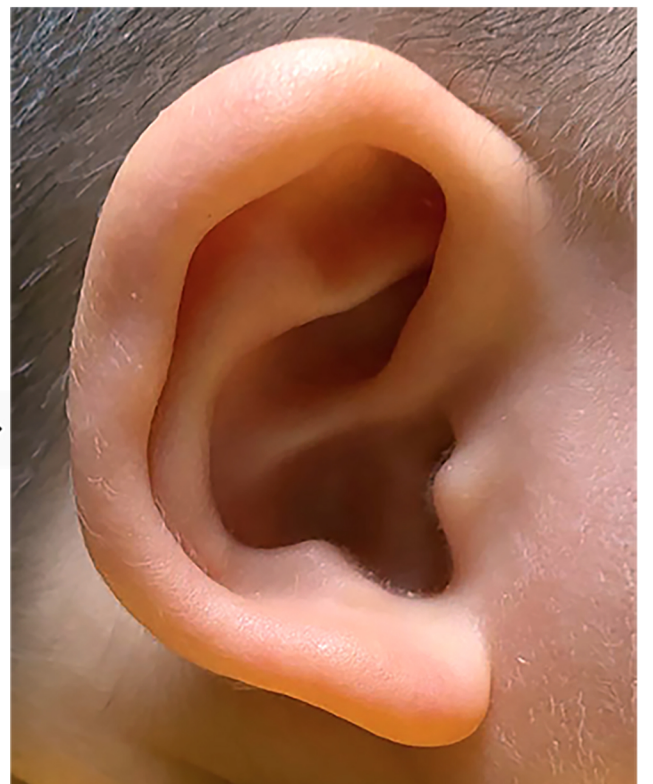

Supplement: prs-151-0159-s003.pdf [file prs-151-0159-s003.pdf]

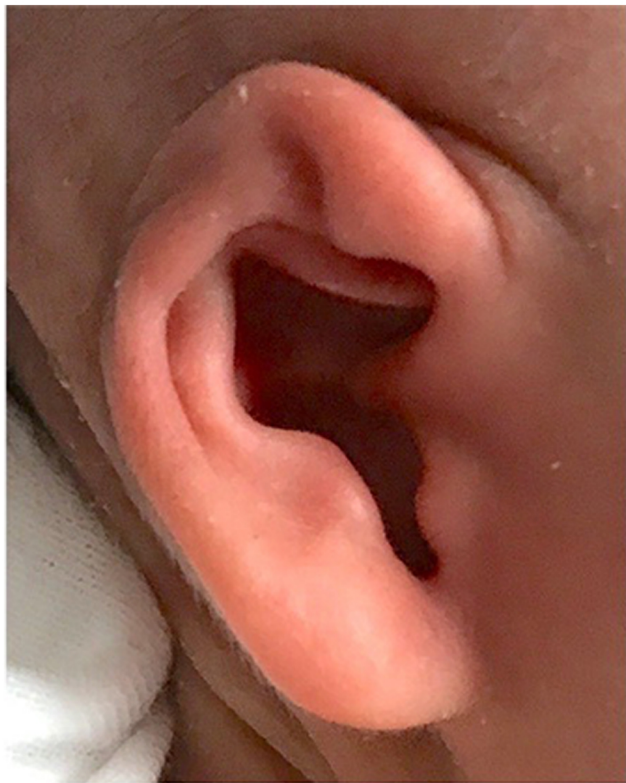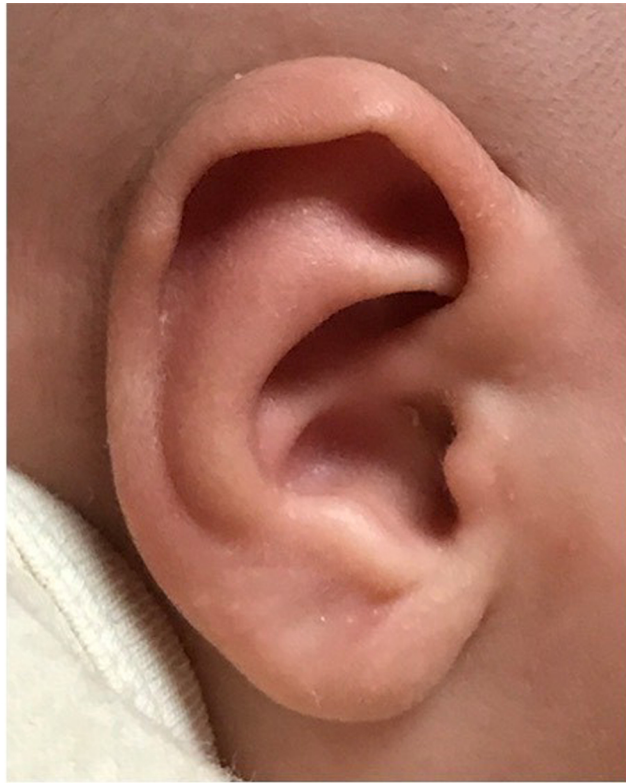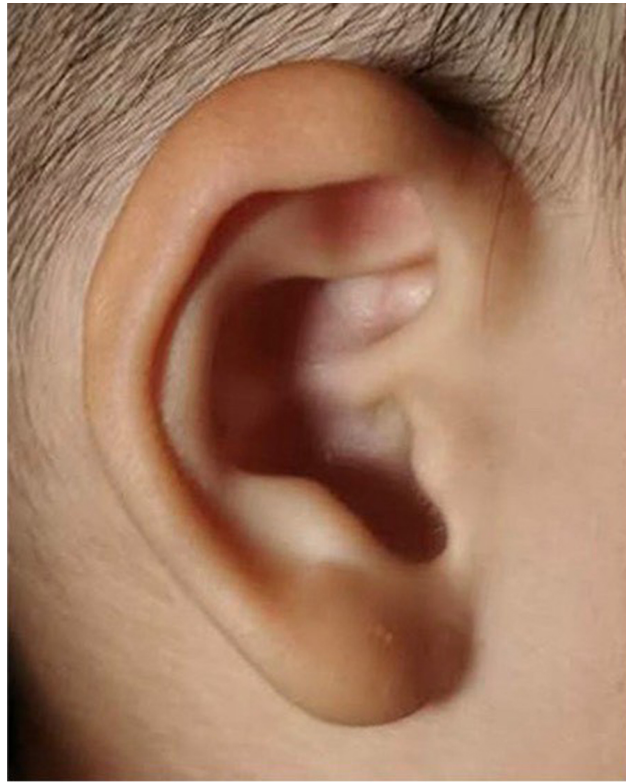

Supplement: prs-151-0159-s004.pdf [file prs-151-0159-s004.pdf]

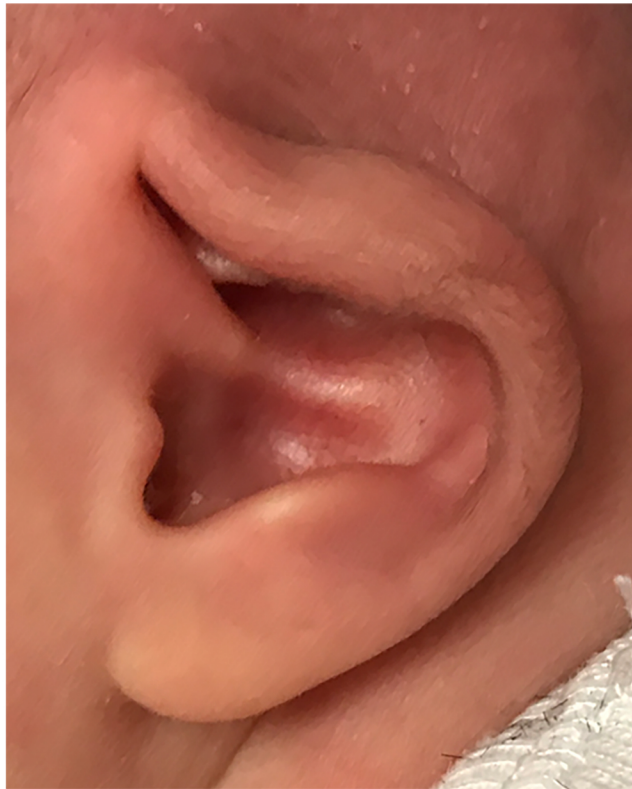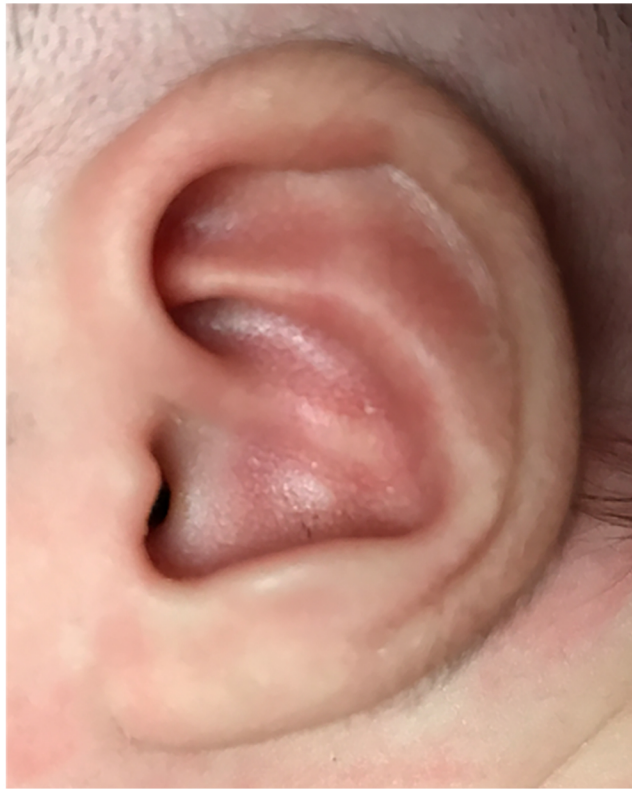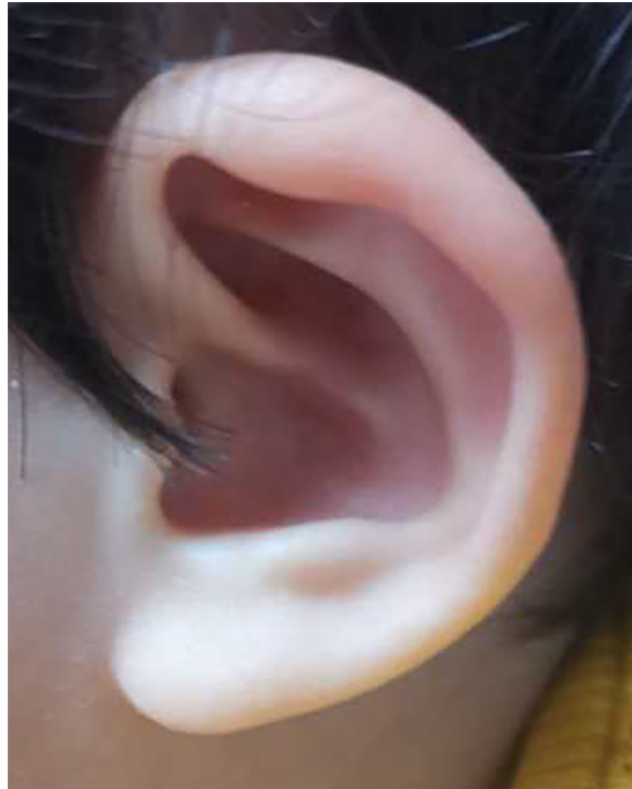

Supplement: prs-151-0159-s005.pdf [file prs-151-0159-s005.pdf]

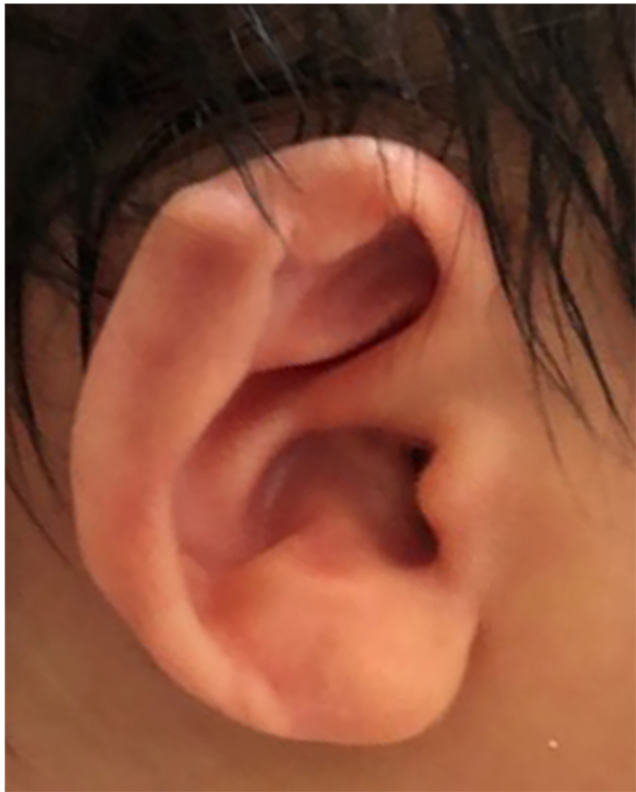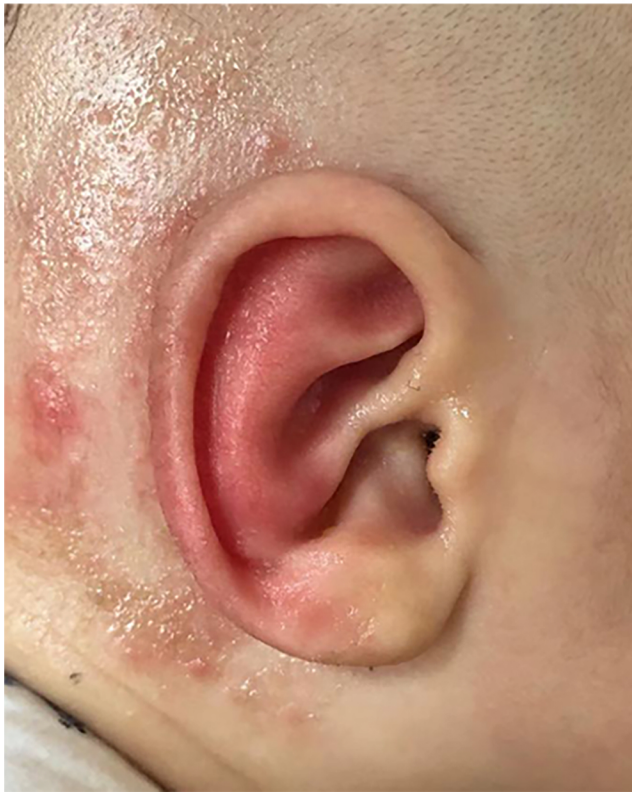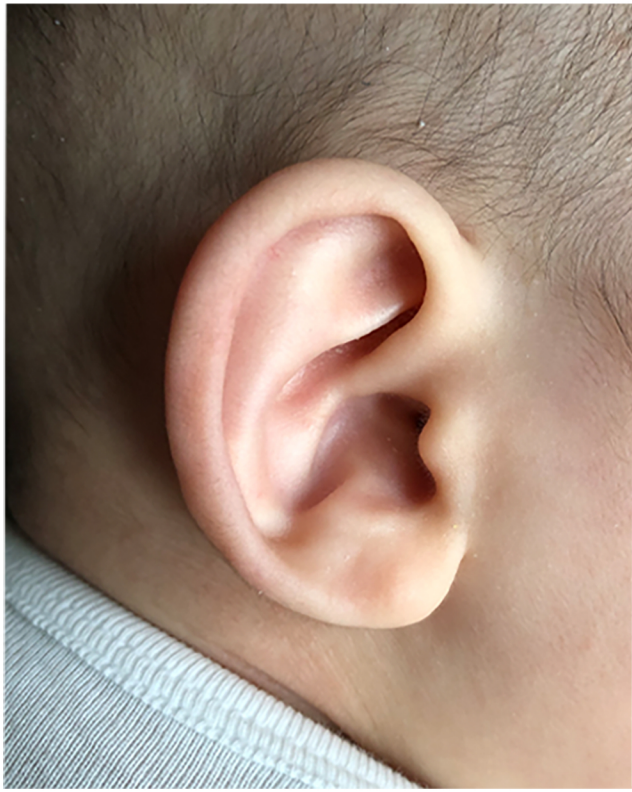

Supplement: prs-151-0159-s006.pdf [file prs-151-0159-s006.pdf]

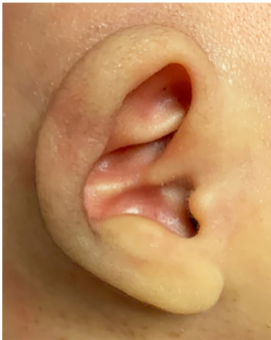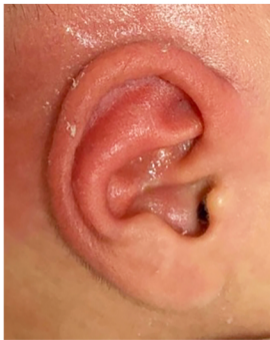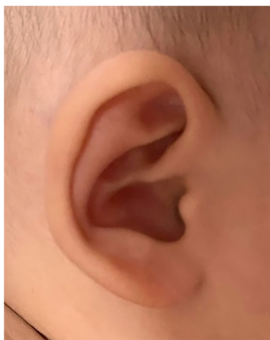

Supplement: prs-151-0159-s007.pdf [file prs-151-0159-s007.pdf]
